# Supplementary material for: Visual perception of highly memorable images is mediated by a distributed network of ventral visual regions that enable a late memorability response
Source: PLoS Biol. 2024 Apr 1;22(4):e3002564. doi: 10.1371/journal.pbio.3002564 (PMC10984539; doi:10.1371/journal.pbio.3002564)
Supplement: S1 Table — We use the Natural Image Statistical Toolbox [73,74,101] to compare low-level statistics (color, brightness, contrast, and spatial frequency at various energy levels) across the set of 78 High Memorable images and the set of 78 Low Memorable images. The spectral energy levels of 10%, 30%, 50%, 70%, and 90% refer to the percentage of total energy of the spectrum in the image sets (larger percentages encompass the energy levels of lesser percentages). In RGB color space, the “R,” “G,” and “B” denote significance testing within the “Red,” “Green,” and “Blue” color channels, respectively. In Lab color space, “L,” “a,” and “b” denote significance testing within “Luminance,” “a color channel,” and “b color channel,” respectively. At a p-value of p < 0.05, no statistically significant differences were found. (XLSX) [file pbio.3002564.s004.xlsx]

## Sheet: Sheet1
Spectral Energy Level (Spatial Frequency)						Color Distribution
Test	0.1	0.3	0.5	0.7	0.9	RGB Space				Lab Space (brightness and contrast)
t - value	0.7147	1.3951	1.6443	1.7984	1.9448	Test	R	G	B	L	a	b
p - value	0.4759	0.165	0.1021	0.0741	0.0536	t - value	1.5344	1.635	0.4361	1.3713	-0.7075	1.2408
						p - value	0.127	0.1041	0.6634	0.1723	0.4803	0.2165
